# Supplementary material for: Complete Epstein-Barr virus seropositivity in a large cohort of patients with early multiple sclerosis
Source: PubMed Central journal article supplement — J Neurol Neurosurg Psychiatry. 2020 May 5;91(7):681–6. doi: 10.1136/jnnp-2020-322941 (PMC7361012; doi:10.1136/jnnp-2020-322941), 2020-05-05
Supplement: jnnp-2020-322941supp001.pdf [file jnnp-2020-322941supp001.pdf]

**Supplementary Table 1**

**Reactivities to EBV antigens included in the recomLine EBV IgG immunoblot in undiluted sera of 17 patients with CIS/RRMS in whom antibodies to EBNA-1 and VCA could not be detected in diluted sera by Liaison automated quantitative CLIA**

| Sample ID number | EBV Antigen (recomLine EBV IgG immunoblot) |           |           |       |       |                      |                     |
|------------------|--------------------------------------------|-----------|-----------|-------|-------|----------------------|---------------------|
|                  | EBNA-1 (p72)                               | VCA (p18) | VCA (p23) | ZEBRA | BZLF1 | early antigen (p138) | early antigen (p54) |
| 102              | +                                          | +++       | +++       | -     | +++   | +/-                  | +++                 |
| 179              | +                                          | +         | +++       | -     | -     | -                    | -                   |
| 532              | ++                                         | +         | +         | -     | ++    | -                    | -                   |
| 683              | ++                                         | +++       | +++       | -     | ++    | -                    | -                   |
| 738              | ++                                         | +++       | +++       | -     | +/-   | -                    | +/-                 |
| 792              | +                                          | +         | +++       | -     | +++   | -                    | -                   |
| 850              | +                                          | +++       | ++        | -     | +     | +                    | +/-                 |
| 901              | ++                                         | +++       | +         | -     | +/-   | -                    | +/-                 |
| 947              | +                                          | +++       | +++       | -     | +++   | -                    | +/-                 |

|      |     |     |     |   |     |     |     |
|------|-----|-----|-----|---|-----|-----|-----|
| 1015 | ++  | +++ | +++ | - | +/- | -   | -   |
| 1308 | ++  | +++ | +++ | - | +++ | +/- | +   |
| 1906 | -   | +/- | ++  | - | +++ | -   | -   |
| 1958 | -   | +   | +/- | - | +/- | -   | -   |
| 2010 | +   | ++  | +++ | - | +   | -   | -   |
| 2231 | +/- | +++ | +   | - | +/- | -   | -   |
| 2408 | -   | ++  | ++  | - | -   | -   | -   |
| 2714 | +/- | +++ | +++ | - | -   | -   | +/- |

Band intensities were rated with respect to the band intensity of a cut-off band, which is included in the recomLine EBV IgG

immunoblot as an internal control, as follows:

No reaction: -  
 Intensity weaker than cut-off band: +/-  
 Intensity similar to cut-off band: +  
 Intensity stronger than cut-off band: ++  
 Very strong intensity: +++

Bands with intensities rated as “+,” “++” and “+++” are considered to indicate the presence of antibodies to EBV, see also the manual of the Mikrogen recomLine EBV IgG immunoblot (GARLEB014D\_2015-06).

EBNA-1 (p72), p72 Epstein-Barr nuclear antigen-1; VCA (p18), p18 viral capsid antigen; VCA (p23), p23 viral capsid antigen; ZEBRA, immunodominant sequence of the ZEBRA protein, an immediate early antigen; BZLF1, complete ZEBRA protein, an immediate early antigen
