# Supplementary material for: Complete Epstein-Barr virus seropositivity in a large cohort of patients with early multiple sclerosis
Source: PubMed Central journal article supplement — J Neurol Neurosurg Psychiatry. 2020 May 5;91(7):681–6. doi: 10.1136/jnnp-2020-322941 (PMC7361012; doi:10.1136/jnnp-2020-322941), 2020-05-05
Supplement: jnnp-2020-322941supp002.pdf [file jnnp-2020-322941supp002.pdf]

**Supplementary Table 2**

**Seropositivity for IgG antibodies to Epstein-Barr nuclear antigen-1 (EBNA-1), IgG antibodies to EBV viral capsid antigen (VCA), and IgM antibodies to VCA across different age cohorts in a large hospital population**

| Age cohort (years) | EBV seropositivity <sup>a</sup> (%) | EBNA1 IgG positive (%) | VCA IgM positive (%) | VCA IgG positive (%) | Persons <sup>b</sup> (number) | All negative <sup>c</sup> (number) | At least one positive <sup>d</sup> (number) |
|--------------------|-------------------------------------|------------------------|----------------------|----------------------|-------------------------------|------------------------------------|---------------------------------------------|
| <0.25              | 91.67                               | 73.33                  | 0.00                 | 76.67                | 60                            | 5                                  | 55                                          |
| 0.25 – <0.5        | 61.54                               | 38.46                  | 2.56                 | 46.15                | 39                            | 15                                 | 24                                          |
| 0.5 – <0.75        | 26.83                               | 17.07                  | 2.44                 | 21.95                | 41                            | 30                                 | 11                                          |
| 0.75 – <1          | 18.37                               | 8.16                   | 4.08                 | 10.20                | 49                            | 40                                 | 9                                           |
| 1 – <1.5           | 21.49                               | 7.44                   | 7.44                 | 17.36                | 121                           | 95                                 | 26                                          |
| 1.5 – <2           | 45.65                               | 23.19                  | 13.77                | 39.13                | 138                           | 75                                 | 63                                          |
| 2 – 4              | 57.79                               | 36.59                  | 12.86                | 54.53                | 552                           | 233                                | 319                                         |
| 5 – 9              | 67.94                               | 46.62                  | 10.23                | 65.34                | 577                           | 185                                | 392                                         |
| 10 – 14            | 70.93                               | 55.90                  | 9.41                 | 66.99                | 712                           | 207                                | 505                                         |
| 15 – 19            | 84.26                               | 60.50                  | 18.02                | 81.29                | 1010                          | 159                                | 851                                         |

|         |       |       |       |       |      |    |      |
|---------|-------|-------|-------|-------|------|----|------|
| 20 – 24 | 92.15 | 74.30 | 11.29 | 89.03 | 930  | 73 | 857  |
| 25 – 29 | 95.00 | 80.27 | 7.58  | 91.84 | 1201 | 60 | 1141 |
| 30 – 34 | 95.91 | 81.76 | 6.91  | 94.03 | 1173 | 48 | 1125 |
| 35 – 39 | 97.31 | 84.12 | 4.14  | 94.80 | 1039 | 28 | 1011 |
| 40 – 44 | 97.31 | 85.94 | 3.72  | 96.17 | 967  | 26 | 941  |
| 45 – 49 | 98.51 | 87.83 | 4.22  | 97.19 | 1208 | 18 | 1190 |
| 50 – 54 | 98.00 | 85.18 | 3.22  | 97.07 | 1397 | 28 | 1369 |
| 55 – 59 | 98.96 | 85.30 | 2.49  | 97.75 | 1245 | 13 | 1232 |
| 60 – 64 | 98.14 | 85.59 | 2.70  | 96.93 | 1076 | 20 | 1056 |
| 65 – 69 | 98.70 | 85.16 | 2.12  | 97.64 | 849  | 11 | 838  |
| 70 – 74 | 98.44 | 82.99 | 1.95  | 97.14 | 770  | 12 | 758  |
| 75 – 79 | 99.08 | 85.50 | 2.94  | 98.17 | 545  | 5  | 540  |
| ≥80     | 96.55 | 82.54 | 4.31  | 95.69 | 464  | 16 | 448  |

<sup>a</sup>Epstein-Barr virus (EBV) seropositivity was defined as seropositivity of at least one of the three antibodies, Epstein-Barr nuclear antigen-1 (EBNA-1) immunoglobulin (Ig)G, EBV viral capsid antigen (VCA) IgG or VCA IgM.

<sup>b</sup>Number of persons available for analysis in the different age cohorts.

<sup>c</sup>Number of persons in whom EBNA-1 IgG and VCA IgG and VCA IgM were negative.

<sup>d</sup>Number of persons in whom at least one of the three investigated antibodies (EBNA-1 IgG, VCA IgG, VCA IgM) was positive.
