# Supplementary material for: Complete Epstein-Barr virus seropositivity in a large cohort of patients with early multiple sclerosis
Source: PubMed Central journal article supplement — J Neurol Neurosurg Psychiatry. 2020 May 5;91(7):681–6. doi: 10.1136/jnnp-2020-322941 (PMC7361012; doi:10.1136/jnnp-2020-322941), 2020-05-05
Supplement: jnnp-2020-322941supp003.pdf [file jnnp-2020-322941supp003.pdf]

## Supplementary Figure 1

EBNA-1 IgG seropositivity by age in patients with CIS/RRMS and patients from the hospital population

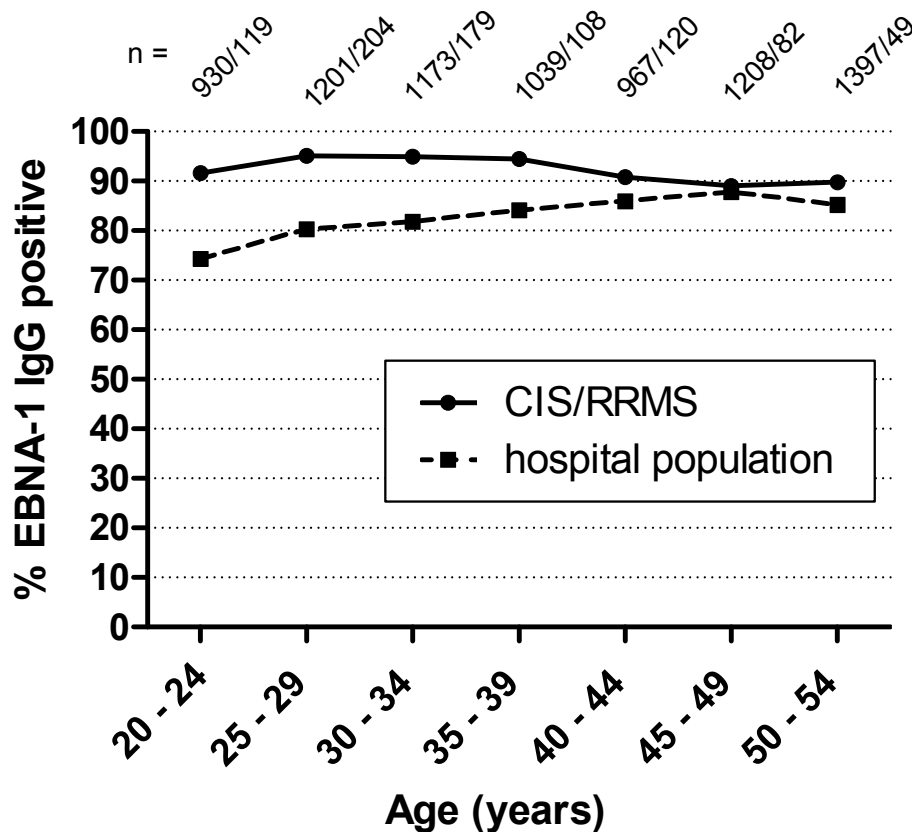

Patients with CIS/RRMS were grouped into the same 5-year age cohorts as patients from the hospital population (see also Patients and Methods and Figure 1). The age of patients with CIS/RRMS ranged from 18 to 75 years. For better comparability with the patients from the hospital population and due to low numbers of patients <20 (n = 19) and >55 years (n = 21), patients with CIS/RRMS <20 and >55 years were excluded from the analysis. The number of patients from the hospital population/patients with CIS/RRMS analysed in each age cohort is indicated above the graph.

CIS, clinically isolated syndrome; RRMS, relapsing-remitting multiple sclerosis
